# Supplementary material for: A new pnictidehalide with van der Waals host–guest interactions exhibiting both geometric spin frustration and resistive humidity sensitivity
Source: Royal Society of Chemistry journal article supplement (doi:10.1039/c7nj03351f), 2017-12-15
Supplement: c7nj03351f1.pdf [file c7nj03351f1.pdf]

## Supporting Information

### **A new pnictidehalide with Van Der Waals' host-guest interactions exhibiting both geometrically spin frustration and resistive humidity sensitivity**

Si-Yan Peng,<sup>\*a,b</sup> Liu-Sai Yang,<sup>a</sup> Ming-Shui Yao,<sup>b</sup> and Le-Shu Yu<sup>a</sup>

<sup>a</sup> School of Chemistry and Environmental Science, Shangrao Normal University, Shangrao, Jiangxi 343001, P. R. China.

<sup>b</sup> State Key Laboratory of Structural Chemistry, Fujian Institute of Research on the Structure of Matter, Chinese Academy of Sciences, Fuzhou, Fujian 350002, P. R. China.

\* To whom correspondence should be addressed: E-mail: psypsy524@126.com.

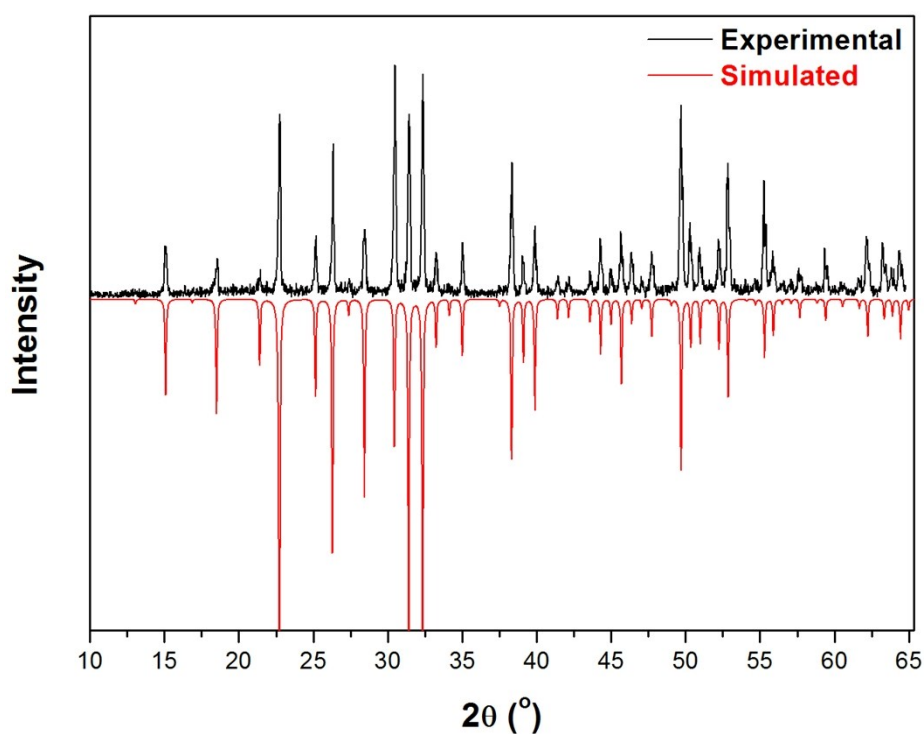

**Figure S1.** Simulated and experimental (~300 K) XRD powder patterns of **1**.

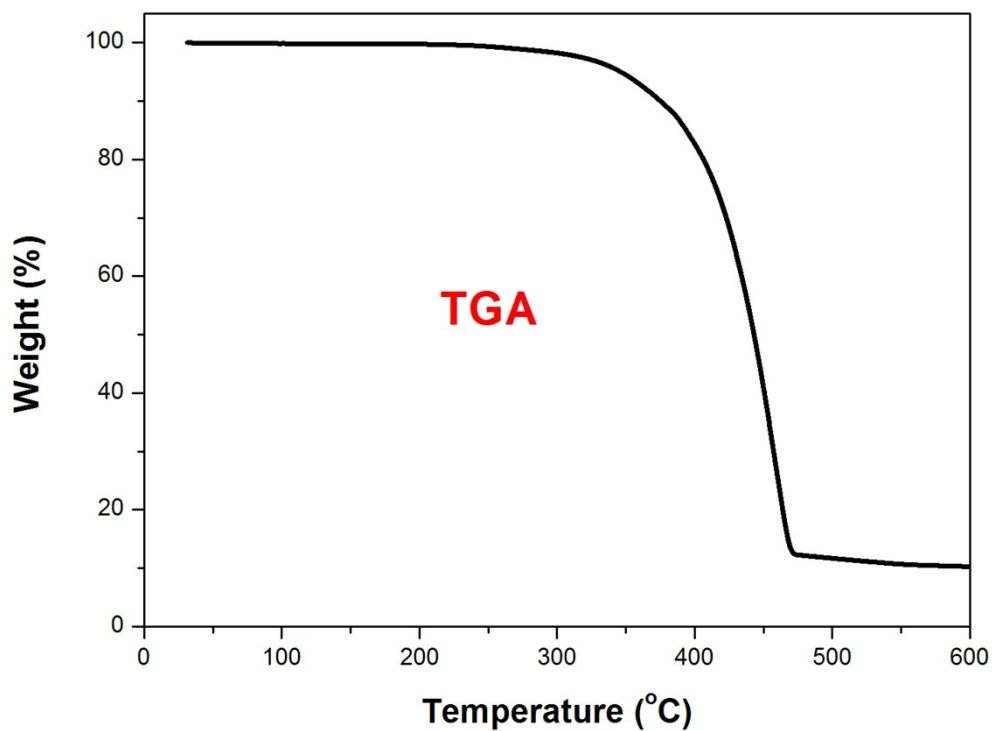

Figure S2. TGA spectrum of **1**

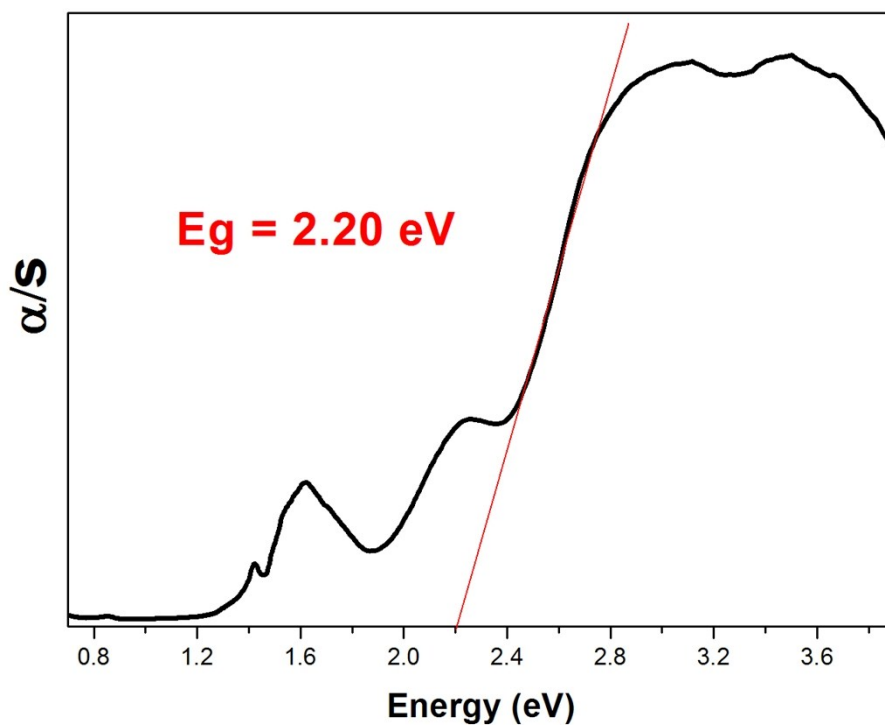

Figure S3. UV diffuse reflectance spectrum of **1** at room temperature. The minor absorptions below 2.20 eV can be ascribed to intraband transition in the valence band or conduction band.

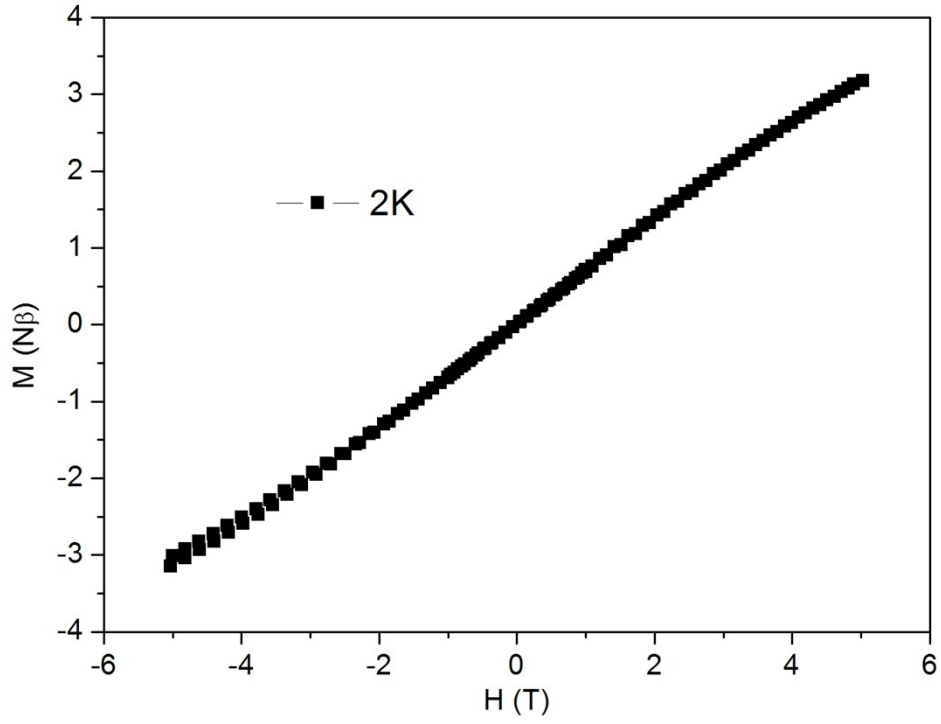

**Figure S4.** Magnetic loop of 1 at 2K

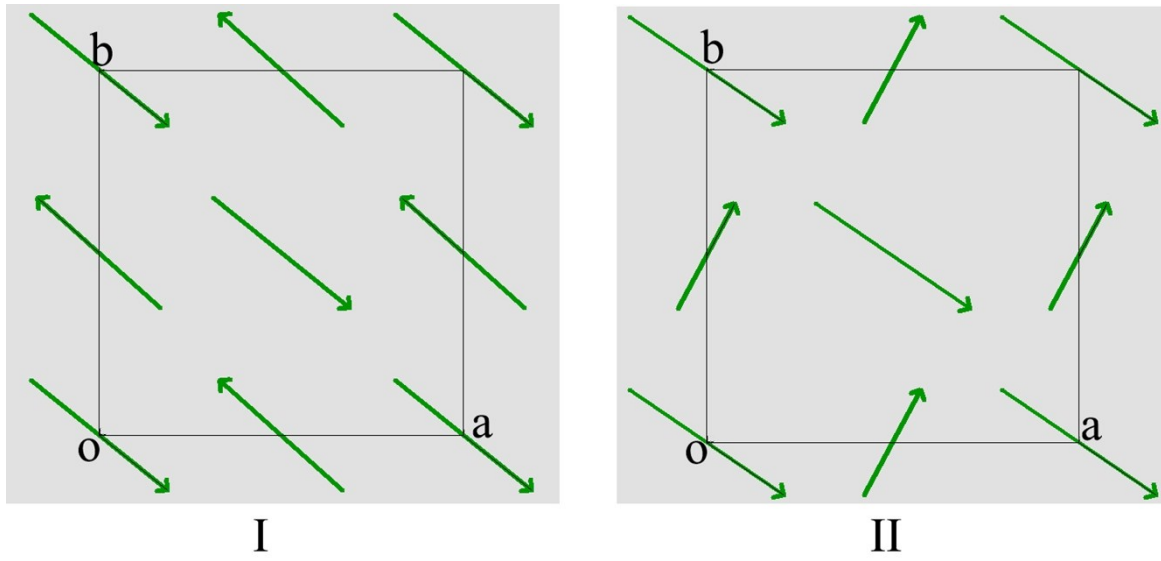

**Figure S5.** View of spin configurations of phase I and II along the  $c$  direction.
